# Supplementary material for: Multi-stimuli responsive supramolecular hydrogels based on Fe3+ and diblock copolymer micelle complexation
Source: Royal Society of Chemistry journal article supplement (doi:10.1039/c5py01742d), 2016-01-01
Supplement: c5py01742d1.pdf [file c5py01742d1.pdf]

## Support information

### **Multi-stimuli Responsive Supramolecular Hydrogel Based on Fe<sup>3+</sup> and Diblock Copolymer Micelles Complexation**

Zhen Tao, Kang Peng, Yujiao Fan, Yunfei Liu and Haiyang Yang\*

*CAS Key Laboratory of Soft Matter Chemistry, School of Chemistry and Materials Science, University of Science and Technology of China, Hefei, 230026, P. R. China.*

\* corresponding author: Haiyang Yang

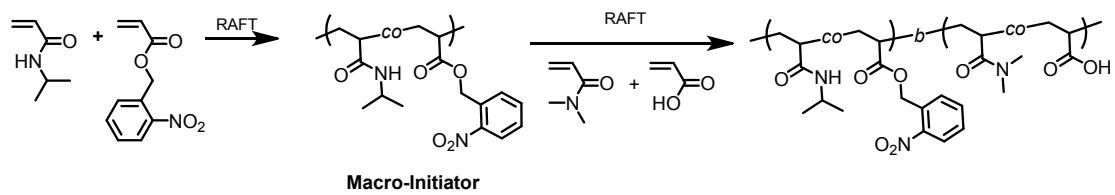

**Figure S1.** Schematic presentation of synthesis of P1 diblock copolymer *via* RAFT Polymerization.

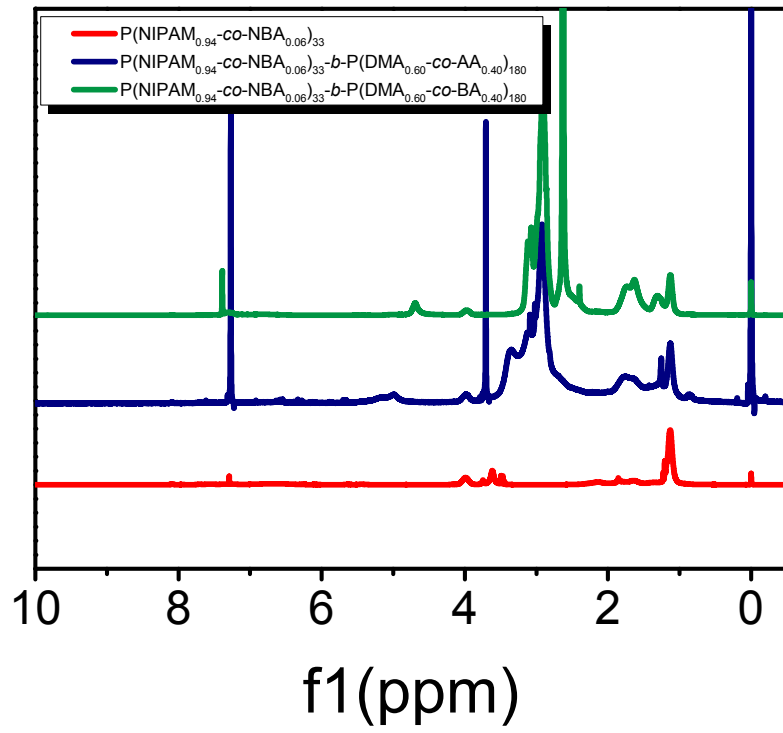

**Figure S2.** <sup>1</sup>H-NMR spectra of P1 diblock copolymer.

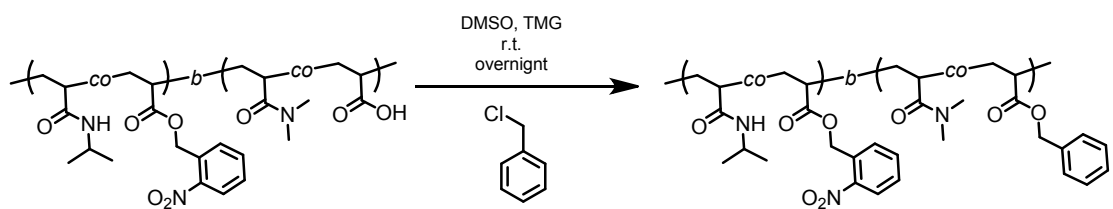

**Figure S3.** Schematic presentation of conversion of P(DMA-co-AA) into P(DMA-co-BA) by esterification for determination of the length of P(DMA-co-AA) *via*  $^1\text{H-NMR}$ .

**Table S1.  $\langle D_h \rangle$  and PDI for each copolymer sample confirmed by DLS measurements.**

| Entry | Polymer                                                                                                   | $\langle D_h \rangle$ | PDI  |
|-------|-----------------------------------------------------------------------------------------------------------|-----------------------|------|
| P1    | $P(\text{DMA}_{0.6}\text{-co-AA}_{0.4})_{180}\text{-b-P}(\text{NIPAM}_{0.94}\text{-co-NBA}_{0.06})_{33}$  | 425                   | 0.14 |
| P2    | $P(\text{DMA}_{0.6}\text{-co-AA}_{0.4})_{180}\text{-b-P}(\text{NIPAM}_{0.94}\text{-co-NBA}_{0.06})_{69}$  | 344                   | 0.13 |
| P3    | $P(\text{DMA}_{0.6}\text{-co-AA}_{0.4})_{180}\text{-b-P}(\text{NIPAM}_{0.94}\text{-co-NBA}_{0.06})_{109}$ | 180                   | 0.15 |

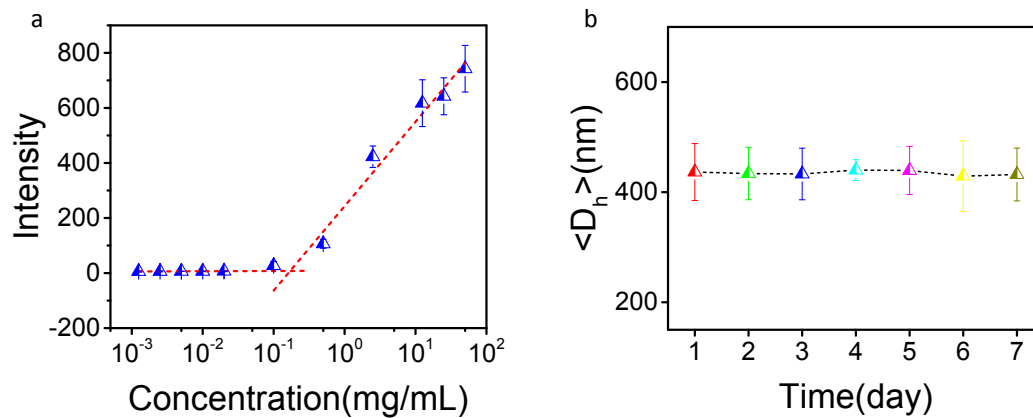

**Figure S4.** CMC value (a) and micellar stability (b) of P1 determined by concentration- and time-dependent DLS measurements.

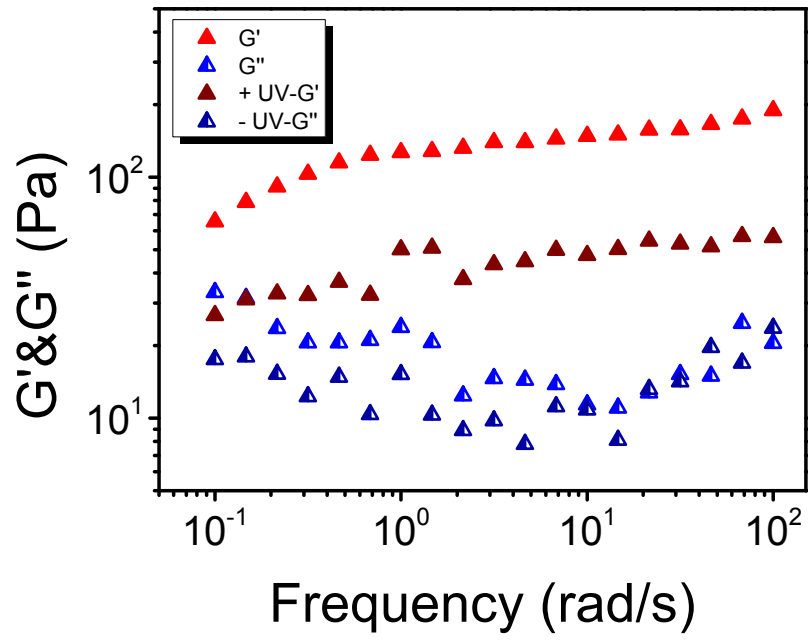

Figure S5.  $G'$  and  $G''$  versus frequency of the copolymer hydrogel with polymer wt% at 15%.

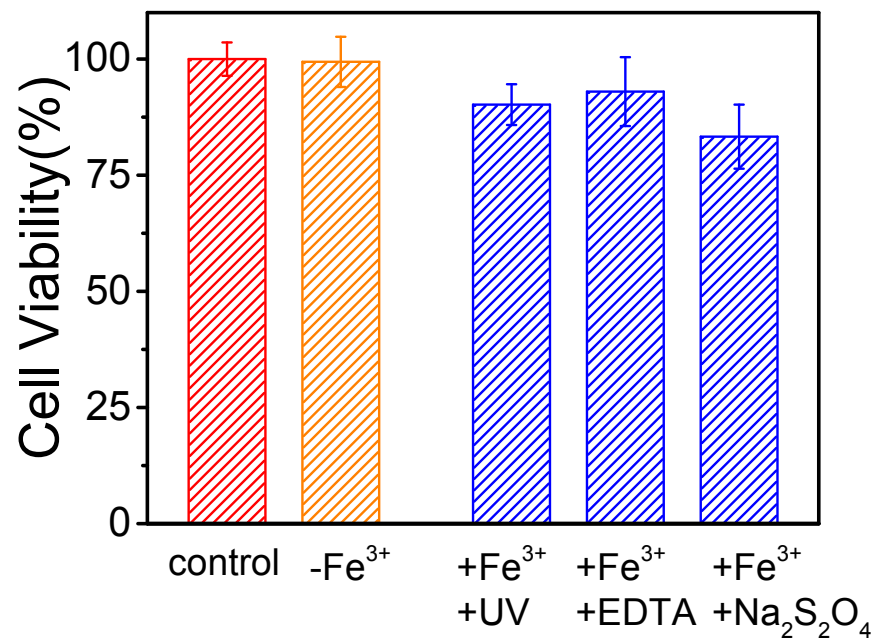

**Figure S6.** *In vitro* cytotoxicity evaluation before Complexation, after Complexation and degradation triggered by UV, EDTA and Na<sub>2</sub>S<sub>2</sub>O<sub>4</sub>.
